# Supplementary material
Source: ML conference proceedings conference paper supplement (https://openreview.net/forum?id=xtaX3WyCj1)
Supplement: supplementary_material [file attachment]

**Algorithm 1** TIES-MERGING Procedure.**Input:** Fine-tuned models  $\{\theta_t\}_{t=1}^n$ , Initialization  $\theta_{\text{init}}$ ,  $k$ , and  $\lambda$ .**Output:** Merged Model  $\theta_m$ **forall**  $t$  **in**  $1, \dots, n$  **do**

▷ Create task vectors.

 $\tau_t = \theta_t - \theta_{\text{init}}$ 

▷ Step 1: Trim redundant parameters.

 $\hat{\tau}_t \leftarrow \text{keep\_topk\_reset\_rest\_to\_zero}(\tau_t, k)$  $\hat{\gamma}_t \leftarrow \text{sgn}(\hat{\tau}_t)$  $\hat{\mu}_t \leftarrow |\hat{\tau}_t|$ **end**

▷ Step 2: Elect Final Signs.

 $\gamma_m = \text{sgn}(\sum_{t=1}^n \hat{\tau}_t)$ 

▷ Step 3: Disjoint Merge.

**forall**  $p$  **in**  $1, \dots, d$  **do**|  $\tau_m^p \leftarrow \text{Mean}_{\{t \in [n] \mid \gamma_t^p = \gamma_m^p\}}(\hat{\tau}_t^p)$ **end**

▷ Obtain merged checkpoint

 $\theta_m \leftarrow \theta_{\text{init}} + \lambda * \tau_m$ **return**  $\theta_m$ 600 **A Additional Results**

| Method                   | Estimating Sign |         |         | Average            |
|--------------------------|-----------------|---------|---------|--------------------|
|                          | Multitask       | Samples | Init.   |                    |
| <b>Fine-Tuned</b>        | -               | -       | -       | 71.4               |
| <b>Multitask</b>         | -               | -       | -       | 73.1               |
| <b>Averaging [9, 76]</b> | -               | -       | -       | 58.0               |
| <b>Task Vectors [29]</b> | -               | -       | -       | 63.9               |
| <b>TIES-MERGING</b>      | -               | -       | -       | <b>66.4</b>        |
| <b>TIES-MERGING</b>      | ✓               | 32      | scratch | 66.5 [+0.1]        |
|                          | ✓               | 32      | mean    | 67.7 [+1.2]        |
|                          | ✓               | All     | scratch | <b>72.0 [+5.6]</b> |

Table 5: **Merging Performance can be improved by estimating the Sign Vector by performing few-shot multitask training.** We use the estimated sign as the elected sign and perform merging.601 **A.1 Enhancing Performance by Estimating the Multitask Sign Vector.**

602 Considering the findings, we inquire whether it is possible to efficiently acquire multitask sign vectors  
603 without extensive multitask training. Our proposal involves utilizing a limited number of validation  
604 samples from each task to cheaply train a multitask model and subsequently derive the relevant sign  
605 vector. We create two multitask (IA)<sup>3</sup> models: one developed from scratch and another initialized  
606 using the average of task-specific (IA)<sup>3</sup> models intended for merging. We use 32 validation examples  
607 from each task to train this model. In Table 4, we notice using the sign vector from the fewshot  
608 multitask model initialized with mean yielded a performance increase of 3.8% and 1.3% compared to  
609 Task Arithmetic and TIES-MERGING. Interestingly, training fewshot multitask training from scratch  
610 did not yield significant improvements over TIES-MERGING without sign estimation. We believe  
611 that exploring this area further may result in improved merging techniques.



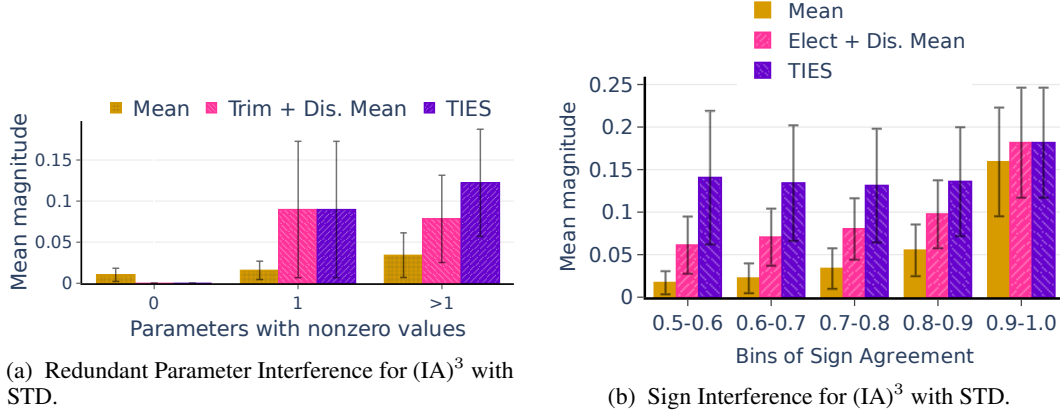

Figure 8: Effect of different types of Merging on the Magnitudes of the Parameters. Here we additionally compare with TIES-MERGING and also provide the standard deviation of parameter values. A high std implies that there is some diversity in magnitude values across different parameters.

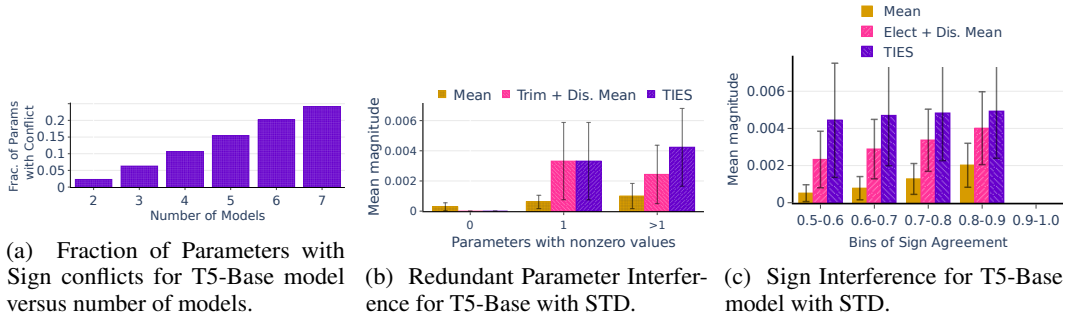

Figure 9: Plots for T5-Base model.

| Method                   | Validation | Average | rte  | cb   | winogrande | wic  | wsc  | copa | h-swag | story cloze | anli-r1 | anli-r2 | anli-r3 |
|--------------------------|------------|---------|------|------|------------|------|------|------|--------|-------------|---------|---------|---------|
| Zeroshot                 | -          | 55.3    | 79.8 | 46.4 | 52.8       | 54.1 | 45.2 | 85   | 36.1   | 91          | 39.7    | 37.6    | 40.5    |
| Fine-Tuned               | -          | 71.4    | 82.7 | 95.8 | 75.1       | 71.7 | 65.3 | 85.3 | 44.4   | 94.9        | 70.2    | 46.5    | 53      |
| Multitask (All, scratch) | -          | 73.1    | 88.6 | 95.8 | 75.5       | 61.1 | 80.6 | 94.1 | 42.3   | 97.6        | 70.5    | 49.8    | 47.7    |
| Multitask (32, scratch)  | -          | 60.9    | 74.9 | 79.2 | 59.3       | 49.2 | 63.9 | 80.9 | 39.5   | 91.6        | 49.4    | 41.9    | 40.1    |
| Multitask (32, mean)     | -          | 65.2    | 79.8 | 83.3 | 61.6       | 54.2 | 66.7 | 85.3 | 41.1   | 94.4        | 58.1    | 46.0    | 46.5    |
| Averaging                | ✗          | 58      | 81.2 | 58.3 | 53.8       | 55.2 | 53.5 | 80.9 | 40.1   | 92.5        | 43.3    | 39.2    | 40.2    |
| Task Arithmetic          | ✗          | 59.2    | 76.5 | 79.2 | 57.7       | 51.6 | 51.4 | 66.2 | 31.4   | 81.5        | 59.8    | 47.5    | 48.2    |
| TIES-MERGING             | ✗          | 64.9    | 81.2 | 87.5 | 60.8       | 59.9 | 58.3 | 80.2 | 42.6   | 91.1        | 58.1    | 46.5    | 47.4    |
| Fisher Merging           | ✓          | 62.2    | 83.3 | 83.3 | 56.7       | 54.2 | 58.3 | 83.1 | 42.2   | 94.1        | 45.9    | 41.0    | 42.2    |
| RegMean                  | ✓          | 58      | 81.2 | 58.3 | 53.8       | 55.2 | 53.5 | 80.9 | 40.1   | 92.5        | 43.3    | 39.2    | 40.2    |
| Task Arithmetic          | ✓          | 63.9    | 74.1 | 83.3 | 62.8       | 49.1 | 49.3 | 87.5 | 41.5   | 95.3        | 60.8    | 49.4    | 50.0    |
| TIES-MERGING             | ✓          | 66.4    | 78.0 | 83.3 | 67.9       | 57.6 | 59.7 | 81.7 | 42.8   | 90.3        | 66.9    | 51.3    | 51.1    |

Table 6: Test set performance when merging IA3 models on eleven tasks. Please refer to Section 6 for experimental details.

## 612 A.2 Detailed Results for Types of Interference and Their Effect on Merging

613 In Section 7.1 and Figure 6, we showed the effect of redundant parameters and sign conflicts on  
614 parameter magnitudes when comparing simple averaging vs disjoint mean after either trimming  
615 or electing and showed that performing these operations helps with the parameter magnitudes. In  
616 Figure 8, we additionally compare with TIES-MERGING and show that performing both trimming  
617 and electing usually results in higher magnitude and also higher standard deviation in parameter  
618 magnitudes. Higher std denotes that all parameter values in the merged model are the same and  
619 that there is a significant variation in the magnitude which is in contrast to simple averaging as it  
620 decreases the magnitude of not redundant parameters and reduces the magnitude of the influential  
621 parameters in the merged model. Similar plots for the T5-base model are provided in Figure 9.



### A.3 Breakdown Per Task

We provide the task level for all the in-domain evaluation experiments in the main Table 1. Table 6, 7, 8, 9, and 10 provide the task level results IA3 [41], T5-Base, T5-Large [54], ViT-B/32, and ViT-L/14 [14] respectively. The task level results of the out-of-domain experiments for T5-Base and T5-Large can be found in Table 11, and 12. Lastly, Figure 10, shows the scaling of the T5-Base model as we merge different numbers of tasks.

| Method          | Validation | Average | paws | qasc | quartz | story_cloze | wiki_qa | winogrande | wsc  |
|-----------------|------------|---------|------|------|--------|-------------|---------|------------|------|
| Zeroshot        | -          | 53.5    | 49.9 | 35.8 | 53.3   | 48.1        | 76.2    | 50         | 61.1 |
| Fine-tuned      | -          | 82.8    | 94.3 | 98.3 | 80.4   | 84.7        | 95.5    | 64.1       | 62.5 |
| Multitask       | -          | 83.6    | 94   | 97.9 | 82.5   | 86.7        | 95      | 64.1       | 65.3 |
| Averaging       | ✗          | 65.9    | 66.4 | 82.6 | 60.2   | 49.5        | 94.1    | 50.4       | 58.3 |
| Task Arithmetic | ✗          | 73.9    | 73.3 | 93.5 | 68.2   | 76.5        | 93.7    | 55.5       | 56.9 |
| TIES-MERGING    | ✗          | 69.7    | 74   | 83.3 | 70.3   | 64.2        | 84.7    | 55.9       | 55.6 |
| Fisher Merging  | ✓          | 68.9    | 69.3 | 85.7 | 63.6   | 56.4        | 93.8    | 50.9       | 62.5 |
| RegMean         | ✓          | 71.2    | 76.8 | 96.2 | 62.5   | 55          | 94.8    | 51.9       | 61.1 |
| Task Arithmetic | ✓          | 73.2    | 73.4 | 93.3 | 67.1   | 71.7        | 94.1    | 52.9       | 59.7 |
| TIES-MERGING    | ✓          | 73.9    | 79.3 | 88.6 | 71.8   | 72.9        | 82.5    | 61.3       | 61.1 |

Table 7: Test set performance when merging T5-base models on seven tasks. Please refer to Section 6 for experimental details.

| Method          | Validation | Average | paws | qasc | quartz | story_cloze | wiki_qa | winogrande | wsc  |
|-----------------|------------|---------|------|------|--------|-------------|---------|------------|------|
| Zeroshot        | -          | 51.7    | 55.4 | 14.3 | 54.1   | 54.1        | 71      | 49.3       | 63.9 |
| Fine-tuned      | -          | 88.8    | 94.4 | 98.9 | 87.8   | 90.8        | 96      | 74.7       | 79.2 |
| Multitask       | -          | 88.1    | 94.2 | 98.5 | 89.3   | 92          | 95.4    | 73.5       | 73.6 |
| Averaging       | ✗          | 59.6    | 61.3 | 82.6 | 70.5   | 53.7        | 63.2    | 49.7       | 36.1 |
| Task Arithmetic | ✗          | 73.5    | 79.2 | 96.8 | 80.2   | 83.6        | 58.6    | 60.2       | 55.6 |
| TIES-MERGING    | ✗          | 74.4    | 80.5 | 96.2 | 81.8   | 78.6        | 62      | 61.9       | 59.7 |
| Fisher Merging  | ✓          | 64.6    | 60.4 | 81.7 | 75     | 60.1        | 88.6    | 50         | 36.1 |
| RegMean         | ✓          | 73.2    | 86   | 96.9 | 80.7   | 78.6        | 82.6    | 51.8       | 36.1 |
| Task Arithmetic | ✓          | 73.3    | 77.8 | 96   | 78.6   | 86.4        | 59.1    | 62.3       | 52.8 |
| TIES-MERGING    | ✓          | 76.9    | 81.5 | 96.2 | 80.1   | 83.6        | 64.9    | 66.5       | 65.3 |

Table 8: Test set performance when merging T5-large models on seven tasks. Please refer to Section 6 for experimental details.

| Method          | Validation | Average | SUN397 | Cars | RESISC45 | EuroSAT | SVHN | GTSRB | MNIST | DTD  |
|-----------------|------------|---------|--------|------|----------|---------|------|-------|-------|------|
| Individual      | -          | 90.5    | 75.3   | 77.7 | 96.1     | 99.7    | 97.5 | 98.7  | 99.7  | 79.4 |
| Multitask       | -          | 88.9    | 74.4   | 77.9 | 98.2     | 98.9    | 99.5 | 93.9  | 72.9  | 95.8 |
| Averaging       | ✗          | 65.8    | 65.3   | 63.4 | 71.4     | 71.7    | 64.2 | 52.8  | 87.5  | 50.1 |
| Task Arithmetic | ✗          | 60.4    | 36.7   | 41   | 53.8     | 64.4    | 80.6 | 66    | 98.1  | 42.5 |
| TIES-MERGING    | ✗          | 72.4    | 59.8   | 58.6 | 70.7     | 79.7    | 86.2 | 72.1  | 98.3  | 54.2 |
| Fisher Merging  | ✓          | 68.3    | 68.6   | 69.2 | 70.7     | 66.4    | 72.9 | 51.1  | 87.9  | 59.9 |
| RegMean         | ✓          | 71.8    | 65.3   | 63.5 | 75.6     | 78.6    | 78.1 | 67.4  | 93.7  | 52   |
| Task Arithmetic | ✓          | 70.1    | 63.8   | 62.1 | 72       | 77.6    | 74.4 | 65.1  | 94    | 52.2 |
| TIES-MERGING    | ✓          | 73.6    | 64.8   | 62.9 | 74.3     | 78.9    | 83.1 | 71.4  | 97.6  | 56.2 |

Table 9: Test set performance when merging ViT-B/32 models on eight tasks. Please refer to Section 6 for experimental details.

## B Implementation Details

**Compute Resources Used and Runtimes.** We executed all our experiments on Nvidia A6000 GPUs equipped with 48GB RAM. Single-task (IA)<sup>3</sup> models for eleven tasks required 1-2 hours per model, while the multitask vector took around 24 hours on four GPUs. The T5-Base and T5-Large models, based on dataset size, needed between 15 minutes and 2 hours per task, and approximately eight hours for the multitask checkpoint. Vision models ViT-B/32 and ViT-L/14 were utilized, as supplied by Ilharco et al. [29].<sup>2</sup> Merge experiments were efficient, with evaluations consuming less

<sup>2</sup>[https://github.com/mlfoundations/task\\_vectors#checkpoints](https://github.com/mlfoundations/task_vectors#checkpoints)



| Method          | Validation | Average | SUN397 | Cars | RESISC45 | EuroSAT | SVHN | GTSRB | MNIST | DTD  |
|-----------------|------------|---------|--------|------|----------|---------|------|-------|-------|------|
| Fine-tuned      | -          | 94.2    | 82.3   | 92.4 | 97.4     | 100     | 98.1 | 99.2  | 99.7  | 84.1 |
| Multitask       | -          | 93.5    | 90.6   | 84.4 | 99.2     | 99.1    | 99.6 | 96.3  | 80.8  | 97.6 |
| Averaging       | ✗          | 79.6    | 72.1   | 81.6 | 82.6     | 91.9    | 78.2 | 70.7  | 97.1  | 62.8 |
| Task Arithmetic | ✗          | 83.3    | 72.5   | 79.2 | 84.5     | 90.6    | 89.2 | 86.5  | 99.1  | 64.3 |
| TIES-MERGING    | ✗          | 86      | 76.5   | 85   | 89.3     | 95.7    | 90.3 | 83.3  | 99    | 68.8 |
| Fisher Merging  | ✓          | 82.2    | 69.2   | 88.6 | 87.5     | 93.5    | 80.6 | 74.8  | 93.3  | 70   |
| RegMean         | ✓          | 83.7    | 73.3   | 81.8 | 86.1     | 97      | 88   | 84.2  | 98.5  | 60.8 |
| Task Arithmetic | ✓          | 84.5    | 74.1   | 82.1 | 86.7     | 93.8    | 87.9 | 86.8  | 98.9  | 65.6 |
| TIES-MERGING    | ✓          | 86      | 76.5   | 85   | 89.4     | 95.9    | 90.3 | 83.3  | 99    | 68.8 |

Table 10: Test set performance when merging ViT-L/14 models on eight tasks. Please refer to Section 6 for experimental details.

635 than 2 minutes for the T5-Base, T5-Large, ViT-B/32, and ViT-L/14 experiments. The assessment  
636 of (IA)<sup>3</sup> models, due to the necessity of using multiple templates from prompt sources and median  
637 result calculations across all templates, required approximately one hour per 11 dataset evaluation.

| Model           | Average | cosmos_qa | social_iqa | quail | wic  | copa | h-swig |
|-----------------|---------|-----------|------------|-------|------|------|--------|
| PAWS            | 35.9    | 18.8      | 25         | 24.8  | 68.8 | 56.2 | 21.9   |
| QASC            | 34.9    | 15.6      | 21.9       | 25.1  | 75   | 53.1 | 18.8   |
| QUARTZ          | 37.4    | 31.2      | 18.8       | 24.3  | 71.9 | 59.4 | 18.8   |
| Story Cloze     | 35      | 6.2       | 25         | 25.6  | 75   | 65.6 | 12.5   |
| Wiki QA         | 24.5    | 18.8      | 21.9       | 24.9  | 28.1 | 43.8 | 9.4    |
| Winogrande      | 28.3    | 18.8      | 25         | 25.7  | 34.4 | 43.8 | 21.9   |
| WSC             | 31.7    | 21.9      | 21.9       | 24.6  | 62.5 | 46.9 | 12.5   |
| Pretrained      | 31.1    | 21.9      | 18.8       | 24.1  | 65.6 | 43.8 | 12.5   |
| Averaging       | 31.7    | 21.9      | 21.9       | 24.6  | 68.8 | 37.5 | 15.6   |
| Fisher Merging  | 33.8    | 15.6      | 21.9       | 24.9  | 65.6 | 53.1 | 21.9   |
| Task Arithmetic | 31.9    | 15.6      | 31.2       | 25.7  | 28.1 | 68.8 | 21.9   |
| RegMean         | 34.3    | 23.1      | 28.1       | 24.9  | 48.4 | 62.5 | 18.8   |
| TIES-MERGING    | 35.3    | 21.9      | 25         | 25.7  | 50   | 65.6 | 23.8   |

Table 11: Out-of-Distribution performance of T5-Base model checkpoints on six tasks. Please refer to Section 6 for experimental details.

638 **Employed Datasets and Associated Licences.** We use the following datasets in the paper with the  
639 following licenses. ANLI [47], WiC [49], WSC [37], and Story Cloze [64], QuaRTz [68], Cars [35],  
640 GTSRB [67] are under Creative Commons License. Winogrande [60], QASC [33] are under Apache  
641 license. COPA [57] is under a BSD-2 Clause license. H-SWAG [80], EuroSAT [24], is under MIT  
642 Licence. MNIST [36] is under Gnu General Public License. We could not find the licences of DTD  
643 [10], RESISC45 [8], SUN397 [78], SVHN [45], CB [42], RTE [11]), and PAWS [82] but they are  
644 publically for research use.

645 **Motivation Experiments Details.** For both Figure 3, and 4 in Section 3, we perform experiment  
646 on the eleven (IA)<sup>3</sup> models used in our PEFT merging experiments (§ 6). For a Figure similar to  
647 Fig. 4 demonstrating the fraction of parameters with a sign conflict for T5-base model, please refer to  
648 Fig. 9a.

649 **Merging in the absence of the Validation Set.** In our investigation into scenarios where a validation  
650 set is not available, we have devised a recipe and identified the optimal hyperparameters, employing  
651 the PEFT experimental procedure detailed in Section 6. This approach was applied to the eleven  
652 task-specific models presented in the same section, utilizing the TIES-MERGING method for tuning  
653 the hyperparameters. Our preliminary estimates for the hyperparameters were  $k = 20$  and  $\lambda$   
654 close to 1. The hyperparameter search was conducted using the eleven task-specific (IA)<sup>3</sup> models,  
655 with  $k \in \{10, 20, 30\}$ , and  $\lambda$  spanning from 0.8 to 3.0, in increments of 0.1. The results of this  
656 comprehensive search indicated an optimal value of  $k = 20$ , with values of  $\lambda = 0.9$ ,  $\lambda = 1.0$ , and  
657  $\lambda = 1.1$  demonstrating equivalent performance. To maintain simplicity in our model, we chose a



| Model           | Average | cosmos_qa | social_qa | quail | wic  | copa | h-swag |
|-----------------|---------|-----------|-----------|-------|------|------|--------|
| PAWS            | 32.3    | 25        | 28.1      | 25.6  | 56.2 | 46.9 | 12.5   |
| QASC            | 33.4    | 21.9      | 28.1      | 25.5  | 43.8 | 62.5 | 18.8   |
| QUARTZ          | 28.7    | 25        | 25        | 25.1  | 25   | 53.1 | 18.8   |
| Story Cloze     | 32.1    | 21.9      | 34.4      | 26.8  | 46.9 | 53.1 | 9.4    |
| Wiki QA         | 27.1    | 25        | 28.1      | 25.2  | 28.1 | 46.9 | 9.4    |
| Winogrande      | 32.4    | 31.2      | 18.8      | 25.6  | 43.8 | 62.5 | 12.5   |
| WSC             | 29.7    | 25        | 25        | 25.1  | 37.5 | 56.2 | 9.4    |
| Pretrained      | 27.6    | 21.9      | 21.9      | 24.9  | 28.1 | 56.2 | 12.5   |
| Averaging       | 30.4    | 31.2      | 25        | 26.3  | 31.2 | 59.4 | 9.4    |
| Fisher Merging  | 32      | 34.4      | 25        | 26.1  | 40.6 | 56.2 | 9.4    |
| Task Arithmetic | 33.3    | 21.9      | 34.4      | 24.6  | 40.6 | 59.4 | 18.8   |
| RegMean         | 36      | 34.4      | 28.1      | 25.3  | 62.5 | 50   | 15.6   |
| TIES-MERGING    | 40.4    | 31.2      | 43.8      | 26.6  | 59.4 | 59.4 | 21.9   |

Table 12: Out-of-Distribution performance of T5-Large model checkpoints on six tasks. Please refer to Section 6 for experimental details.

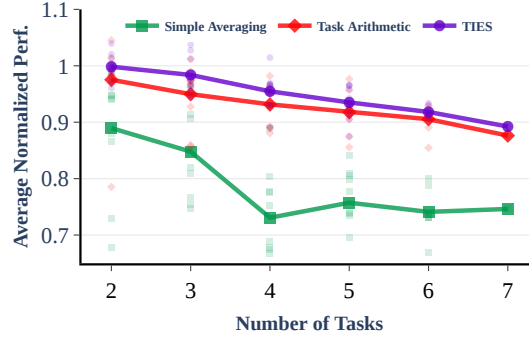

Figure 10: T5-Base with increasing number of task being merged. Average performance when merging a different number of tasks.

658  $\lambda$  value of 1. Thus, the final selection of parameters for TIES-MERGING is  $k = 20$ , signs based on  
659 mass, the disjoint mean, and a  $\lambda$  value of 1.

660 **Merging Different Number of Tasks.** Here we provide some additional details on the experiments  
661 when merging different numbers of tasks. In Fig. 5, we perform the experiment with T5-Large when  
662 merging the seven tasks considered in Tab. 1 and described in Sec. 6. The x-axis shows the different  
663 number of tasks being merged. Note that when merging  $T$  tasks, we have a total of  $\binom{7}{T}$  combinations.  
664 However, in our experiment, we sample at most 10 distinct combinations for each value of  $T$ . A  
665 similar plot for the T5-Base model is shown in Fig. 10.

666 **Training Details.** In our research, we utilized two variants of the T5 model, specifically the T5-base  
667 and T5-large models, which were trained to a maximum of 75,000 steps. An effective training batch  
668 size of 1024 was implemented, alongside a learning rate (lr) of 0.0001. We instituted an early stopping  
669 mechanism with a patience threshold of 5 to prevent overfitting. During the training process, bfloat16  
670 was adopted to curtail GPU memory expenditure, and the maximum sequence length was set at 128.  
671 In contrast, for the PEFT configuration of the (IA)<sup>3</sup> approach on the T0-3B model, we modified our  
672 parameters. An effective training batch size of 16 was deployed along with an evaluation batch size  
673 of 32, while maintaining the learning rate at 0.0001. To accommodate the model’s complexity, the  
674 early stopping patience was augmented to 10. We do not use any lr scheduler and weight decay for  
675 any of our model training.

676 For the purpose of evaluation, we perform *rank classification*. In this method, the model’s log  
677 probabilities for all potential label strings are ranked. The model’s prediction is deemed accurate if



678 the choice ranked highest aligns with the correct answer. It should be noted that rank classification  
679 evaluation can accommodate both classification tasks and multiple-choice tasks.
